# Supplementary material for: Fabrication of porous Fe2O3/PTFE nanofiber membranes and their application as a catalyst for dye degradation
Source: Royal Society of Chemistry journal article supplement (doi:10.1039/c5ra27879a), 2016-01-01
Supplement: c5ra27879a1.pdf [file c5ra27879a1.pdf]

## **Fabrication of Porous Fe<sub>2</sub>O<sub>3</sub>/PTFE Nanofiber Membranes and Their Application as Catalyst for Dye Degradation**

Weimin Kang,<sup>a</sup> Fu Li,<sup>a</sup> Yixia Zhao,<sup>b</sup> Chunmei Qiao,<sup>a</sup> Jingge Ju,<sup>a</sup> and Bowen Cheng<sup>\*b</sup>

*a. School of Textile, Tianjin Polytechnic University, Tianjin, 300387, P.R. China*

*b. State Key Laboratory of Separation Membranes and Membrane Processes, Tianjin, 300387, P.R.*

*China*

Corresponding author:

E-mail address: [bowen15@tjpu.edu.cn](mailto:bowen15@tjpu.edu.cn)

### **TG analysis**

Thermal stability PTFE/PVA/BA nanofiber membrane of was investigated by TG/DTA 6300 thermogravimetric analyzer with 2 mg sample at the heat rate of 10 °C/min in the range of 25-500 °C.

### **XRD analysis**

The changes of the crystal phase of PTFE nanofiber membrane were characterized with D/MAX-2500 X-ray diffractometer (XRD, Japan Rigaku).

### **BET analysis**

The Brunauer-Emmet-Teller specific surface area of the as-spun PTFE/PVA/BA nanofiber membrane and the Fe<sub>2</sub>O<sub>3</sub>/PTFE nanofiber membranes were determined using a high-speed automated area and pore size analyzer (3H-2000PS1, Beijing).

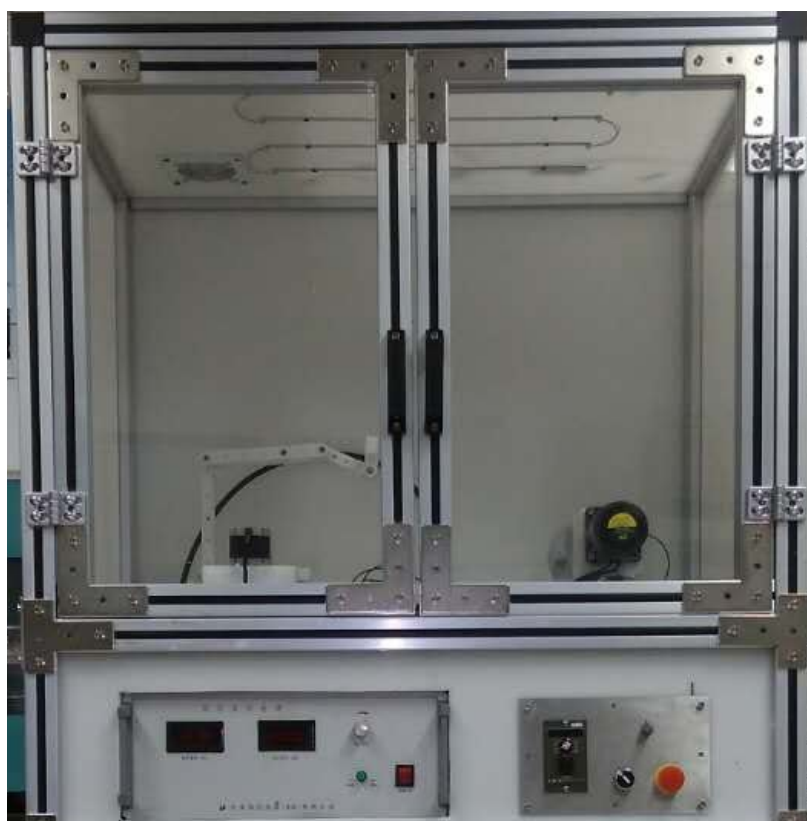

Fig. S1 The photo of the electrospinning device

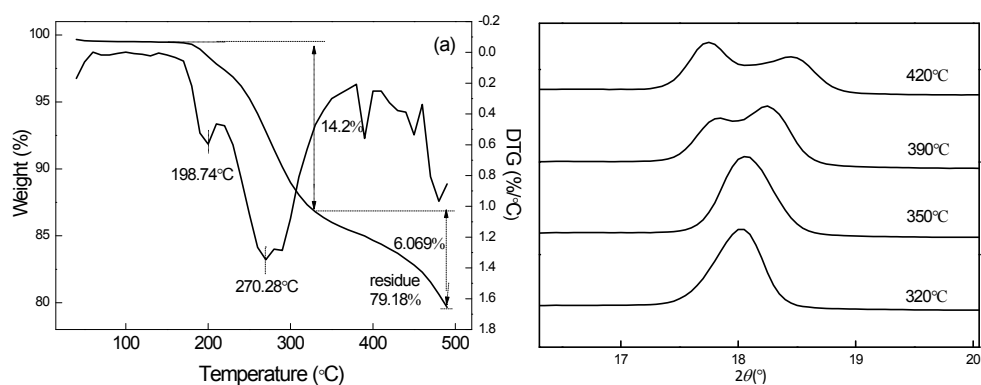

Fig. S2 The TG curve of and XRD patterns of PTFE/PVA/BA nanofiber membrane

**Discussion of Fig. S2** The peak at 198.74 °C was attributed to the decomposition of BA and the peak at 270.28 °C was due to the decomposition of PVA. The PTFE nanofiber membrane was obtained via calcining the as-spun PTFE/PVA/BA nanofiber membrane. In the XRD patterns, the crystal structure changed due to the molecular chain motion when the calcination temperature higher than 390 °C. Then the calcination temperature was set as 390 °C.

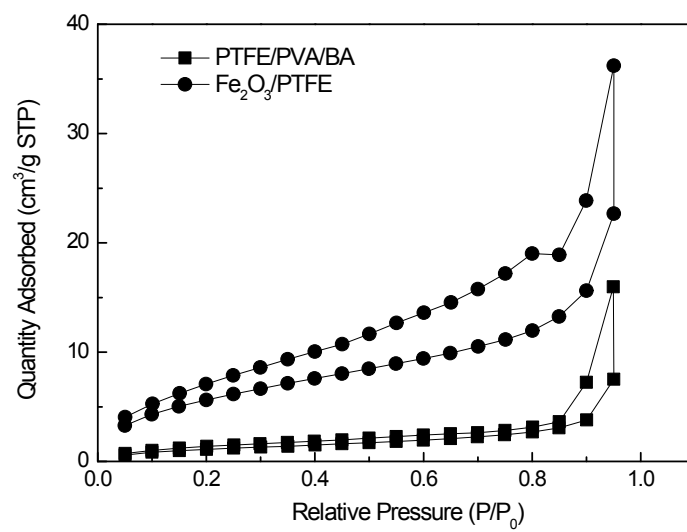

Fig. S3 The N<sub>2</sub> adsorption isotherms at 77 K of samples
